# Supplementary material for: Development and evaluation of a live birth prediction model for evaluating human blastocysts from a retrospective study
Source: eLife journal article supplement (doi:10.7554/elife.83662), 2023-02-21
Supplement: supp [file elife-83662-supp-v1.zip]

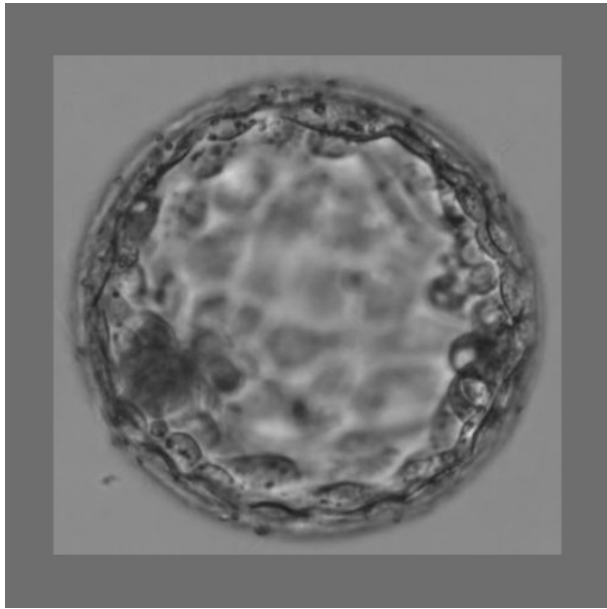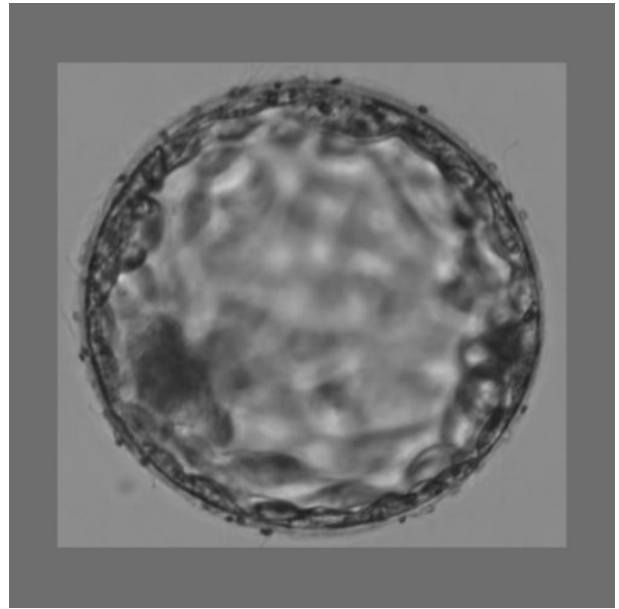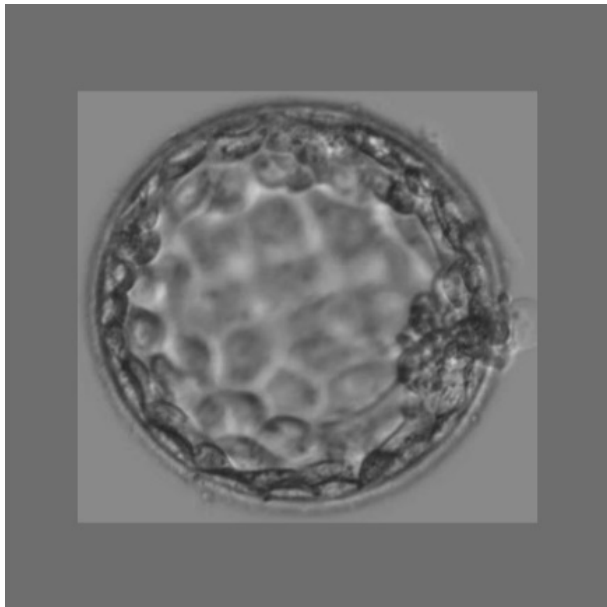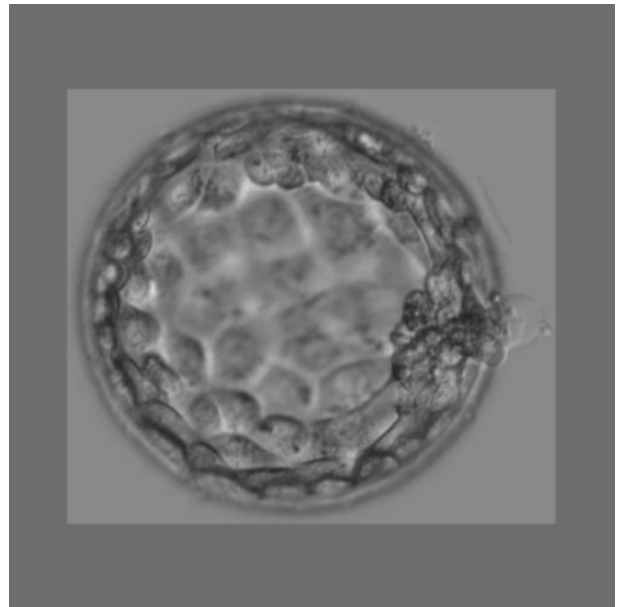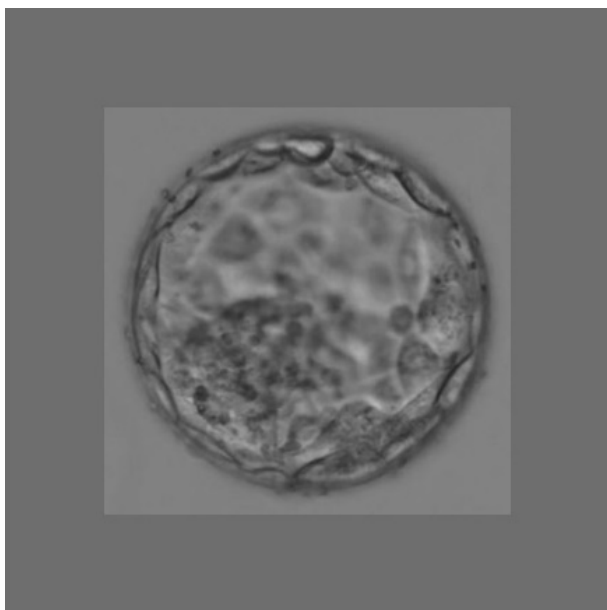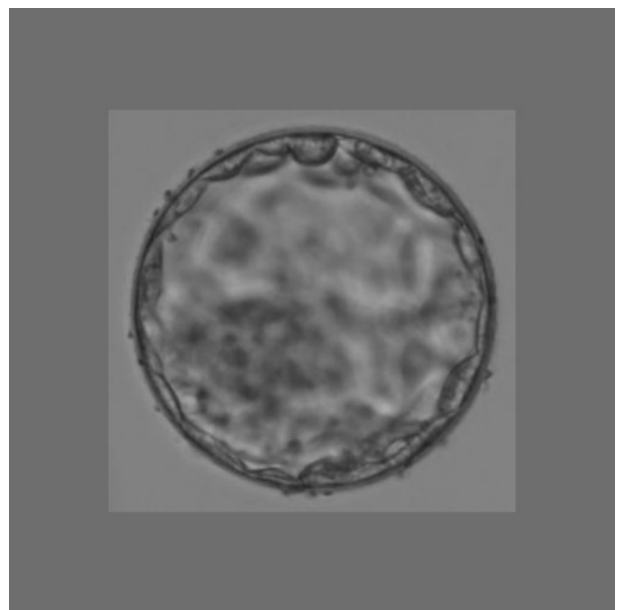

Figure 4-supplement 1. Two-channel blastocyst images, one channel focusing on the ICM (left column), the other channel focusing on the TE (right column) of a same blastocyst.
