# Supplementary material for: Development and evaluation of a live birth prediction model for evaluating human blastocysts from a retrospective study
Source: eLife journal article supplement (doi:10.7554/elife.83662), 2023-02-21
Supplement: supp [file Figure-2-Data.xlsx]

## Sheet: Sheet1
Embryo_Index	Birth_Label	Image_Only_Predicted_Score	Image_All_ClinicalFeatures_Predicted_Score	Image_All_ClinicalFeatures_Exclude_EM_Predicted_Score
1	0	0.611411	0.431399	0.556147
2	0	0.309126	0.145549	0.161531
3	1	0.60644	0.639971	0.619373
4	1	0.738613	0.728236	0.725219
5	0	0.705482	0.621568	0.409709
6	0	0.207657	0.488922	0.60571
7	1	0.664779	0.558634	0.650972
8	0	0.491494	0.740802	0.660938
9	0	0.058073	0.123863	0.162519
10	1	0.608502	0.783461	0.720235
11	1	0.482181	0.7778	0.688967
12	0	0.0982796	0.204294	0.254584
13	0	0.547089	0.605274	0.505049
14	0	0.321286	0.345218	0.442321
15	0	0.610671	0.760178	0.7298
16	1	0.685039	0.625094	0.666581
17	1	0.45464	0.666302	0.675301
18	1	0.530358	0.702415	0.620861
19	1	0.138783	0.525986	0.532405
20	1	0.144821	0.650402	0.51901
21	0	0.373878	0.436004	0.500565
22	1	0.659475	0.789392	0.793925
23	0	0.128958	0.28072	0.280535
24	1	0.455851	0.69504	0.607966
25	0	0.20988	0.298617	0.41486
26	1	0.525242	0.332936	0.28672
27	0	0.5974	0.672018	0.750401
28	1	0.586924	0.865742	0.867571
29	0	0.201945	0.393991	0.456064
30	0	0.449277	0.349118	0.47506
31	1	0.673689	0.636212	0.574634
32	0	0.53345	0.391301	0.33403
33	1	0.630579	0.556219	0.409054
34	1	0.437576	0.461996	0.495322
35	1	0.720671	0.538903	0.503842
36	1	0.689727	0.557815	0.516608
37	1	0.613155	0.482448	0.584141
38	1	0.40177	0.730836	0.639005
39	1	0.662154	0.736463	0.811793
40	1	0.130595	0.522874	0.471321
41	1	0.739926	0.75801	0.661496
42	1	0.600541	0.745899	0.780834
43	0	0.677733	0.758275	0.739482
44	0	0.298259	0.461318	0.562274
45	1	0.622394	0.63177	0.677489
46	1	0.312317	0.244759	0.296727
47	1	0.705521	0.738839	0.663482
48	0	0.425293	0.36026	0.344474
49	0	0.479927	0.330901	0.30528
50	0	0.644275	0.754917	0.690686
51	0	0.641444	0.635699	0.685216
52	1	0.579441	0.457007	0.556654
53	0	0.561045	0.327224	0.512077
54	0	0.670655	0.394542	0.401089
55	0	0.250771	0.105105	0.136069
56	1	0.576541	0.440973	0.421571
57	1	0.522323	0.526897	0.528815
58	1	0.550675	0.689014	0.711442
59	0	0.489791	0.425604	0.41557
60	1	0.700561	0.557451	0.596328
61	1	0.677942	0.892551	0.918537
62	0	0.449532	0.760426	0.656757
63	1	0.552999	0.512822	0.591797
64	1	0.678383	0.62857	0.607684
65	0	0.17918	0.436185	0.436674
66	0	0.0343203	0.129503	0.101379
67	0	0.406597	0.490311	0.502648
68	1	0.458766	0.629607	0.645688
69	1	0.596703	0.57671	0.492971
70	0	0.520748	0.525241	0.507685
71	1	0.50665	0.655295	0.719148
72	0	0.193232	0.310621	0.369323
73	0	0.701438	0.517865	0.669102
74	0	0.702514	0.750941	0.744219
75	1	0.106529	0.251649	0.357069
76	1	0.611843	0.750012	0.715444
77	0	0.0125345	0.213827	0.250466
78	1	0.630208	0.776269	0.612271
79	0	0.647876	0.241027	0.302925
80	1	0.637613	0.825681	0.706392
81	1	0.565002	0.49022	0.361658
82	0	0.667126	0.805024	0.727467
83	0	0.654773	0.387478	0.376257
84	1	0.531755	0.553821	0.649091
85	0	0.585835	0.62464	0.606582
86	0	0.101746	0.10365	0.0799656
87	1	0.725199	0.773282	0.57024
88	0	0.182195	0.249339	0.270298
89	1	0.720873	0.820131	0.817393
90	1	0.501823	0.641873	0.601015
91	0	0.318259	0.586479	0.530003
92	0	0.493023	0.189092	0.309183
93	1	0.647003	0.810003	0.753878
94	1	0.546635	0.688698	0.622272
95	0	0.568765	0.579853	0.607393
96	1	0.697512	0.734544	0.853383
97	0	0.644009	0.634862	0.560201
98	0	0.499742	0.270166	0.229087
99	1	0.540946	0.740927	0.653817
100	0	0.672305	0.685687	0.723495
101	1	0.192059	0.491495	0.471629
102	1	0.372939	0.327338	0.327724
103	0	0.372783	0.341642	0.348086
104	1	0.654855	0.557385	0.585121
105	1	0.548042	0.727943	0.817353
106	0	0.210402	0.37956	0.484565
107	1	0.603261	0.493625	0.435315
108	1	0.602026	0.65102	0.58973
109	1	0.531718	0.591571	0.59192
110	0	0.585993	0.471768	0.488709
111	1	0.674053	0.257035	0.221488
112	0	0.153799	0.0496836	0.116726
113	0	0.462798	0.25576	0.230713
114	1	0.63737	0.617133	0.645915
115	0	0.602822	0.723605	0.725016
116	1	0.68416	0.753402	0.732355
117	1	0.618324	0.786782	0.784836
118	0	0.436467	0.356741	0.420766
119	0	0.0254198	0.440388	0.463435
120	1	0.593611	0.543721	0.652399
121	1	0.453214	0.801151	0.750941
122	1	0.581432	0.499669	0.552575
123	0	0.575517	0.573365	0.593212
124	0	0.685983	0.554437	0.584951
125	0	0.515296	0.345165	0.401351
126	0	0.276929	0.476942	0.487674
127	0	0.59652	0.270164	0.532014
128	0	0.445288	0.629994	0.563464
129	1	0.661105	0.829198	0.847316
130	1	0.68304	0.569325	0.521002
131	1	0.264666	0.309896	0.285634
132	0	0.575912	0.0680534	0.117108
133	1	0.560022	0.66186	0.585667
134	1	0.465016	0.990333	0.990998
135	0	0.659847	0.623877	0.644853
136	0	0.620283	0.44665	0.502363
137	0	0.203499	0.345086	0.378411
138	0	0.564205	0.235487	0.216936
139	1	0.678253	0.584566	0.572867
140	0	0.16691	0.464728	0.479936
141	1	0.310492	0.370991	0.415139
142	0	0.473598	0.591033	0.424355
143	1	0.657748	0.749897	0.749511
144	1	0.625612	0.76401	0.666032
145	1	0.705197	0.693848	0.678432
146	1	0.66063	0.584431	0.61035
147	1	0.670248	0.788569	0.7491
148	0	0.156998	0.424786	0.422403
149	0	0.612397	0.547245	0.490364
150	1	0.445476	0.451354	0.494223
151	1	0.49168	0.761242	0.715184
152	1	0.233605	0.519962	0.548131
153	0	0.59612	0.310352	0.273229
154	0	0.63514	0.667597	0.747218
155	0	0.216536	0.305947	0.286485
156	1	0.532768	0.718199	0.55196
157	0	0.186634	0.395577	0.366461
158	1	0.65806	0.517299	0.645849
159	0	0.622414	0.708748	0.63003
160	1	0.675819	0.82826	0.724845
161	0	0.287962	0.366373	0.416806
162	0	0.455597	0.393012	0.543938
163	0	0.568671	0.317074	0.476367
164	0	0.447457	0.21446	0.220205
165	1	0.635572	0.557739	0.595773
166	0	0.693046	0.711685	0.689558
167	1	0.625385	0.555265	0.685205
168	1	0.619065	0.542774	0.610022
169	0	0.364349	0.450006	0.493647
170	0	0.0783457	0.182784	0.123734
171	1	0.54682	0.695368	0.660385
172	1	0.655284	0.705241	0.694763
173	1	0.639231	0.741459	0.647177
174	1	0.705413	0.731472	0.650342
175	0	0.533022	0.552708	0.613591
176	0	0.27821	0.491891	0.495441
177	0	0.352393	0.329804	0.397388
178	0	0.0492132	0.111081	0.0934106
179	0	0.0797132	0.145015	0.135581
180	1	0.430258	0.667241	0.661331
181	0	0.531938	0.476808	0.485728
182	1	0.658201	0.439421	0.444969
183	1	0.231263	0.527774	0.445789
184	1	0.0230526	0.213363	0.233769
185	0	0.611124	0.1799	0.155545
186	0	0.664857	0.789573	0.744857
187	0	0.544053	0.194192	0.25162
188	1	0.693114	0.733767	0.780022
189	0	0.349321	0.305071	0.330053
190	0	0.675062	0.623205	0.6686
191	1	0.50414	0.608901	0.651343
192	0	0.520406	0.403246	0.460241
193	1	0.6778	0.712874	0.747177
194	1	0.698699	0.712115	0.728137
195	0	0.592671	0.55914	0.578093
196	1	0.554672	0.500899	0.480031
197	0	0.690045	0.259119	0.185968
198	0	0.618817	0.31693	0.29031
199	0	0.571634	0.695132	0.664674
200	1	0.487719	0.539242	0.506408
201	0	0.54554	0.205995	0.466774
202	1	0.620216	0.681014	0.624104
203	0	0.553273	0.415803	0.276411
204	1	0.579638	0.641926	0.624114
205	1	0.63564	0.663653	0.683643
206	1	0.6521	0.706298	0.634882
207	0	0.564647	0.578547	0.495963
208	1	0.405069	0.286784	0.304002
209	0	0.492753	0.472687	0.483658
210	1	0.175137	0.256973	0.272835
211	0	0.607714	0.70254	0.667116
212	0	0.374009	0.356554	0.422333
213	1	0.673034	0.792234	0.753692
214	1	0.348178	0.575345	0.550832
215	0	0.726533	0.254713	0.460093
216	0	0.623288	0.405647	0.199553
217	0	0.399932	0.651335	0.698779
218	0	0.578746	0.84092	0.838494
219	1	0.572089	0.844079	0.738446
220	0	0.543204	0.288043	0.277573
221	1	0.222262	0.30706	0.327162
222	0	0.590468	0.321262	0.391496
223	1	0.696056	0.849383	0.853888
224	0	0.152	0.384508	0.494691
225	0	0.67541	0.726852	0.676414
226	1	0.688029	0.74173	0.731408
227	1	0.572716	0.651041	0.778737
228	0	0.262841	0.173468	0.152587
229	1	0.472453	0.484868	0.500903
230	1	0.610552	0.572869	0.599566
231	0	0.689386	0.227679	0.257046
232	0	0.347404	0.573093	0.567278
233	1	0.687156	0.564648	0.462357
234	1	0.13639	0.326783	0.371309
235	0	0.569489	0.693167	0.582632
236	0	0.604292	0.446098	0.444602
237	0	0.278375	0.273766	0.388414
238	0	0.102001	0.141	0.121511
239	0	0.531977	0.613341	0.64309
240	1	0.288936	0.361465	0.39257
241	0	0.631803	0.382968	0.533432
242	1	0.321106	0.502372	0.487163
243	0	0.548061	0.400317	0.513652
244	0	0.479911	0.388129	0.353541
245	0	0.137329	0.16141	0.0913124
246	1	0.39856	0.617741	0.61195
247	0	0.508541	0.31052	0.431151
248	1	0.479142	0.420291	0.386851
249	1	0.394509	0.398663	0.394633
250	1	0.65007	0.81128	0.789881
251	0	0.600449	0.363904	0.421311
252	0	0.620797	0.556491	0.576311
253	1	0.663921	0.769362	0.672438
254	1	0.664286	0.65275	0.24939
255	1	0.670159	0.657117	0.61174
256	0	0.292921	0.179945	0.187047
257	0	0.0786289	0.378767	0.378211
258	0	0.0975966	0.185429	0.145908
259	0	0.636278	0.511831	0.445671
260	0	0.598248	0.239559	0.203143
261	1	0.337319	0.579946	0.64988
262	0	0.359201	0.133806	0.17396
263	1	0.657153	0.592135	0.55343
264	1	0.679181	0.774494	0.659666
265	0	0.48418	0.342616	0.248035
266	1	0.691045	0.756224	0.674801
267	0	0.681608	0.33528	0.599042
268	1	0.222741	0.352624	0.351859
269	0	0.053251	0.290795	0.37695
270	0	0.702685	0.789482	0.766343
271	1	0.250916	0.446405	0.463154
272	0	0.376167	0.188928	0.285197
273	0	0.705719	0.731405	0.691487
274	0	0.0634532	0.24157	0.300148
275	1	0.626581	0.548087	0.571706
276	1	0.380786	0.441436	0.565436
277	0	0.545848	0.631478	0.647011
278	0	0.23231	0.444289	0.472562
279	0	0.573954	0.317972	0.305714
280	0	0.538567	0.388586	0.442023
281	1	0.621639	0.76431	0.725714
282	1	0.540819	0.684781	0.588682
283	1	0.334427	0.560262	0.446187
284	0	0.528532	0.398573	0.61769
285	1	0.232548	0.814362	0.803378
286	1	0.399855	0.503671	0.645797
287	0	0.0845519	0.0927391	0.149081
288	0	0.128363	0.503042	0.54048
289	1	0.730555	0.788949	0.737868
290	0	0.61943	0.434212	0.574524
291	0	0.244093	0.305776	0.478407
292	0	0.653912	0.674391	0.643528
293	1	0.439247	0.704262	0.571322
294	0	0.673948	0.405553	0.402246
295	1	0.683295	0.761294	0.673844
296	1	0.394572	0.336329	0.28476
297	0	0.274536	0.104112	0.138938
298	0	0.0831431	0.122413	0.259781
299	0	0.721682	0.389574	0.28668
300	0	0.585963	0.687757	0.633358
301	0	0.217761	0.235946	0.318466
302	0	0.622444	0.540333	0.586893
303	0	0.00520308	0.293992	0.184277
304	1	0.566771	0.792043	0.682956
305	1	0.712228	0.801901	0.69444
306	1	0.145847	0.538044	0.4331
307	1	0.625532	0.693084	0.635321
308	0	0.349431	0.277254	0.252937
309	1	0.67139	0.795063	0.742387
310	0	0.0947922	0.246256	0.29628
311	0	0.551911	0.492725	0.524923
312	0	0.541273	0.718926	0.685187
313	0	0.52615	0.342807	0.309569
314	0	0.670416	0.750238	0.686139
315	0	0.429297	0.398081	0.454294
316	0	0.339697	0.414488	0.433254
317	1	0.517644	0.492481	0.484125
318	0	0.199786	0.272537	0.246152
319	1	0.622976	0.786662	0.700447
320	0	0.518188	0.470414	0.481332
321	1	0.659198	0.827223	0.750441
322	1	0.454247	0.611811	0.691515
323	1	0.63227	0.70994	0.689376
324	0	0.388625	0.384501	0.3834
325	0	0.215171	0.174911	0.216574
326	1	0.359544	0.690725	0.655634
327	0	0.0220733	0.232542	0.339294
328	1	0.584592	0.475679	0.464612
329	0	0.156474	0.308695	0.361163
330	0	0.304326	0.349836	0.343688
331	0	0.0726134	0.235884	0.337414
332	1	0.388529	0.563115	0.575098
333	1	0.184795	0.359589	0.416944
334	0	0.12077	0.298164	0.329965
335	1	0.661126	0.691989	0.640783
336	0	0.392052	0.65432	0.539552
337	0	0.549825	0.786358	0.6379
338	1	0.592078	0.815124	0.80652
339	1	0.587319	0.297313	0.340593
340	1	0.736353	0.541911	0.604649
341	1	0.644384	0.68897	0.625449
342	0	0.179316	0.125477	0.110299
343	1	0.641841	0.546899	0.555703
344	0	0.470936	0.463636	0.513247
345	0	0.656835	0.632577	0.621548
346	1	0.629242	0.837588	0.7501
347	0	0.140493	0.439417	0.425604
348	1	0.355353	0.246958	0.418328
349	1	0.524034	0.547794	0.529198
350	0	0.698416	0.452307	0.426886
351	0	0.0496258	0.36673	0.341284
352	0	0.23984	0.329566	0.431515
353	0	0.504743	0.32344	0.369476
354	1	0.346983	0.294233	0.520308
355	0	0.590822	0.0606224	0.0552547
356	1	0.678219	0.76536	0.727978
357	1	0.473706	0.428156	0.405414
358	0	0.67834	0.603016	0.67177
359	0	0.422289	0.297099	0.320184
360	0	0.355065	0.611022	0.64788
361	0	0.649795	0.337596	0.541636
362	0	0.270901	0.197605	0.142798
363	1	0.424304	0.641404	0.555829
364	0	0.653831	0.350147	0.511974
365	1	0.674097	0.72691	0.761549
366	0	0.729394	0.588159	0.517453
367	1	0.612137	0.760963	0.691301
368	1	0.522168	0.730747	0.69628
369	0	0.599414	0.772616	0.685655
370	1	0.422961	0.491598	0.562499
371	0	0.131161	0.228234	0.26418
372	0	0.401329	0.61424	0.512526
373	1	0.681788	0.57828	0.539024
374	1	0.400127	0.645036	0.707104
375	1	0.591574	0.739791	0.681493
376	1	0.0599994	0.352784	0.48117
377	0	0.617252	0.760561	0.705676
378	0	0.535965	0.427709	0.402063
379	0	0.456408	0.488211	0.367147
380	0	0.627383	0.67637	0.626151
381	0	0.730771	0.516752	0.683157
382	0	0.516943	0.219517	0.305803
383	1	0.602591	0.422053	0.4471
384	1	0.602873	0.433058	0.513839
385	1	0.285009	0.564185	0.525784
386	0	0.608357	0.727716	0.663178
387	0	0.18001	0.391997	0.410312
388	1	0.613786	0.619345	0.510232
389	0	0.624227	0.782792	0.739096
390	1	0.613791	0.759354	0.732506
391	1	0.546986	0.593837	0.502091
392	0	0.117013	0.397896	0.529481
393	0	0.260232	0.318586	0.354538
394	1	0.384088	0.595353	0.50213
395	1	0.622311	0.644738	0.596003
396	1	0.538854	0.423682	0.455652
397	1	0.508386	0.569751	0.550469
398	0	0.646477	0.3975	0.525436
399	0	0.51443	0.407318	0.405771
400	0	0.49423	0.548162	0.329322
401	1	0.71334	0.717435	0.672543
402	0	0.192778	0.146176	0.128753
403	0	0.631374	0.711543	0.715824
404	0	0.163736	0.223535	0.409276
405	0	0.160216	0.312095	0.36423
406	1	0.488102	0.616772	0.535258
407	1	0.505653	0.762402	0.692931
408	0	0.399949	0.584095	0.597017
409	0	0.402597	0.598797	0.591234
410	0	0.215568	0.414741	0.448131
411	1	0.660322	0.56395	0.595669
412	0	0.619016	0.553283	0.555706
413	1	0.677848	0.607915	0.428462
414	0	0.0137755	0.215844	0.292061
415	1	0.520678	0.573462	0.421954
416	0	0.566798	0.510547	0.514048
417	0	0.657519	0.761319	0.709186
418	1	0.68796	0.569385	0.650714
419	1	0.408901	0.219944	0.203943
420	0	0.325113	0.189694	0.189377
421	1	0.6669	0.767203	0.845077
422	0	0.518373	0.462612	0.521221
423	1	0.671693	0.557778	0.48741
424	0	0.548405	0.363039	0.317188
425	1	0.453729	0.446987	0.45356
426	0	0.546492	0.426288	0.609124
427	0	0.551015	0.550278	0.400741
428	1	0.705744	0.534617	0.56754
429	0	0.28794	0.295284	0.298712
430	0	0.259823	0.130382	0.0958157
431	0	0.64768	0.641117	0.539935
432	0	0.700002	0.515212	0.46813
433	1	0.663794	0.759851	0.765945
434	1	0.556612	0.579401	0.521758
435	1	0.642824	0.379503	0.273845
436	0	0.15406	0.144565	0.123034
437	1	0.619535	0.685256	0.68519
438	1	0.368581	0.354102	0.298008
439	0	0.522628	0.521315	0.463639
440	0	0.55252	0.720945	0.690998
441	0	0.323962	0.553357	0.601857
442	0	0.683001	0.152816	0.384305
443	1	0.64407	0.580233	0.56382
444	0	0.303291	0.664896	0.716632
445	1	0.579955	0.678513	0.674936
446	0	0.467177	0.434921	0.390454
447	0	0.0896909	0.245177	0.236657
448	1	0.711137	0.670067	0.626031
449	0	0.0581093	0.478929	0.510681
450	1	0.625494	0.825702	0.803498
451	1	0.575195	0.586803	0.570044
452	0	0.694847	0.728572	0.772909
453	0	0.693763	0.533199	0.631252
454	0	0.293788	0.340844	0.29004
455	0	0.694133	0.616675	0.686727
456	0	0.101846	0.0673718	0.0589884
457	0	0.0971537	0.289599	0.214248
458	1	0.663452	0.550175	0.571129
459	1	0.658341	0.693881	0.730948
460	1	0.715947	0.683552	0.687983
461	0	0.627478	0.770201	0.634173
462	0	0.19613	0.143748	0.153052
463	1	0.533048	0.5691	0.525363
464	0	0.613365	0.460568	0.669745
465	0	0.176452	0.252087	0.259796
466	1	0.558528	0.670623	0.663767
467	1	0.622919	0.791533	0.705194
468	0	0.218162	0.305274	0.243837
469	1	0.62642	0.660637	0.72296
470	0	0.582717	0.267436	0.355207
471	0	0.486514	0.624319	0.625709
472	0	0.557098	0.687577	0.579275
473	0	0.547813	0.5317	0.507365
474	0	0.497614	0.484263	0.640123
475	1	0.571556	0.421225	0.399662
476	0	0.116676	0.327389	0.361714
477	1	0.155735	0.355054	0.434742
478	1	0.664877	0.380107	0.351245
479	0	0.197066	0.340275	0.376149
480	0	0.612316	0.308208	0.63553
481	1	0.638543	0.730411	0.593642
482	1	0.181993	0.546549	0.611483
483	1	0.561115	0.731028	0.653058
484	1	0.562169	0.626422	0.639539
485	0	0.532819	0.213618	0.174625
486	0	0.095337	0.319727	0.33686
487	1	0.532499	0.238623	0.240243
488	0	0.382877	0.743015	0.692218
489	1	0.617084	0.618143	0.555295
490	0	0.609009	0.224508	0.548634
491	1	0.446436	0.553203	0.577302
492	0	0.136329	0.110429	0.123907
493	0	0.153258	0.0887066	0.116722
494	1	0.686771	0.797606	0.728304
495	0	0.324454	0.459831	0.253527
496	1	0.645868	0.720006	0.757241
497	1	0.625694	0.5745	0.480423
498	1	0.707019	0.533679	0.649049
499	0	0.662278	0.680255	0.597288
500	0	0.13849	0.287808	0.349356
501	1	0.60086	0.618151	0.53646
502	0	0.138597	0.270727	0.265467
503	1	0.523161	0.282901	0.270204
504	0	0.702493	0.794714	0.728937
505	0	0.716095	0.661944	0.794542
506	0	0.532795	0.545251	0.68871
507	0	0.263148	0.377926	0.380392
508	1	0.421635	0.432594	0.466606
509	0	0.595387	0.797497	0.775045
510	0	0.60897	0.282512	0.307066
511	1	0.352345	0.398188	0.423201
512	1	0.48721	0.434355	0.407774
513	1	0.734178	0.807826	0.79879
514	1	0.643053	0.843669	0.857452
515	0	0.677977	0.660309	0.536301
516	0	0.299924	0.190313	0.284837
517	0	0.207768	0.35182	0.418881
518	1	0.25847	0.694685	0.556892
519	0	0.0154201	0.164648	0.188574
520	0	0.718116	0.677249	0.505802
521	1	0.341084	0.558275	0.494838
522	0	0.436059	0.630462	0.583426
523	1	0.646399	0.728781	0.711712
524	0	0.328952	0.501337	0.499222
525	0	0.181486	0.293663	0.247424
526	1	0.65567	0.640208	0.617788
527	0	0.378468	0.62649	0.683141
528	1	0.135506	0.336996	0.407094
529	0	0.15051	0.169297	0.107625
530	0	0.0421538	0.201567	0.252408
531	1	0.534935	0.544693	0.533145
532	1	0.580172	0.33157	0.371267
533	1	0.60726	0.853894	0.743628
534	1	0.613514	0.635823	0.727983
535	0	0.564276	0.501661	0.553632
536	0	0.657277	0.142283	0.139296
537	1	0.566915	0.453574	0.457691
538	0	0.0624543	0.457313	0.398216
539	0	0.638445	0.76851	0.753589
540	1	0.467108	0.432567	0.463888
541	1	0.663242	0.818179	0.750338
542	1	0.650798	0.804741	0.767168
543	0	0.74681	0.280526	0.38412
544	0	0.513837	0.375483	0.390993
545	1	0.523554	0.499966	0.677916
546	1	0.266415	0.537518	0.548308
547	0	0.575668	0.536689	0.593639
548	0	0.722128	0.475434	0.611581
549	1	0.674345	0.69948	0.81285
550	1	0.636092	0.180125	0.26503
551	1	0.34811	0.485286	0.491072
552	0	0.0157384	0.113726	0.179473
553	1	0.684592	0.631269	0.634796
554	0	0.57094	0.320721	0.460808
555	0	0.161076	0.118633	0.158189
556	1	0.716478	0.827533	0.800092
557	0	0.595248	0.6914	0.901477
558	0	0.122926	0.117788	0.0939773
559	0	0.653006	0.604623	0.618558
560	1	0.117895	0.36404	0.351105
561	1	0.748353	0.813066	0.769662
562	0	0.560387	0.394773	0.355823
563	0	0.399247	0.463578	0.553414
564	0	0.0732921	0.0966738	0.0817062
565	1	0.604007	0.734114	0.784967
566	0	0.465113	0.352397	0.404944
567	1	0.259848	0.294374	0.363797
568	0	0.275023	0.213019	0.26081
569	0	0.605973	0.69661	0.572887
570	1	0.609563	0.66668	0.590045
571	0	0.263048	0.403157	0.485013
572	0	0.162361	0.217961	0.298053
573	0	0.575684	0.357615	0.325536
574	0	0.677724	0.660074	0.748687
575	0	0.573989	0.635477	0.647179
576	0	0.167095	0.40954	0.432441
577	0	0.0931729	0.261742	0.338526
578	0	0.638723	0.705248	0.634078
579	1	0.0962352	0.263129	0.361695
580	0	0.713989	0.506378	0.542376
581	0	0.648198	0.0873679	0.206277
582	0	0.482362	0.125313	0.0952707
583	0	0.582193	0.637516	0.571395
584	0	0.258139	0.21625	0.278521
585	0	0.220034	0.43673	0.411463
586	0	0.600914	0.484213	0.626389
587	1	0.628245	0.561778	0.522884
588	0	0.445274	0.272335	0.216841
589	0	0.648634	0.278331	0.311344
590	1	0.213647	0.595286	0.638777
591	0	0.463754	0.66811	0.648566
592	1	0.633822	0.669683	0.572692
593	1	0.659223	0.254602	0.232071
594	0	0.13268	0.171074	0.260476
595	1	0.662983	0.862684	0.830606
596	1	0.595644	0.680885	0.590336
597	0	0.678164	0.729022	0.629647
598	0	0.624598	0.433216	0.573633
599	0	0.149118	0.250514	0.221265
600	1	0.373344	0.441319	0.363757
601	0	0.437229	0.0820426	0.0460205
602	0	0.624907	0.750648	0.742442
603	0	0.286079	0.387442	0.282129
604	1	0.381382	0.298771	0.325798
605	0	0.221825	0.319797	0.273734
606	0	0.137681	0.449738	0.440252
607	1	0.461644	0.64303	0.601836
608	0	0.629744	0.670724	0.711802
609	0	0.0813667	0.318656	0.394561
610	0	0.387524	0.575658	0.535258
611	1	0.698252	0.702984	0.660335
612	1	0.380484	0.20115	0.27627
613	0	0.701282	0.616956	0.707596
614	0	0.335392	0.391582	0.404995
615	0	0.604615	0.493195	0.667332
616	0	0.642407	0.621169	0.631864
617	1	0.604789	0.582408	0.574213
618	0	0.443562	0.400234	0.46257
619	0	0.550844	0.341929	0.338425
620	1	0.561821	0.341191	0.37642
621	0	0.60803	0.768755	0.747833
622	1	0.559742	0.685452	0.653271
623	0	0.655248	0.623308	0.652696
624	1	0.380822	0.333937	0.286573
625	0	0.636037	0.742593	0.722758
626	1	0.576395	0.741316	0.709335
627	1	0.575412	0.554787	0.49052
628	1	0.277903	0.332986	0.357279
629	1	0.396294	0.239306	0.346445
630	1	0.396433	0.589108	0.62703
631	0	0.483362	0.127468	0.19582
632	0	0.050086	0.0243663	0.0291127
633	0	0.765036	0.362178	0.488069
634	0	0.666226	0.778425	0.830291
635	1	0.667647	0.623037	0.653609
636	0	0.110469	0.544969	0.588404
637	0	0.12415	0.33475	0.366535
638	1	0.5027	0.311362	0.346994
639	0	0.148625	0.248834	0.243476
640	0	0.359337	0.349555	0.34368
641	0	0.592306	0.348003	0.260961
642	0	0.0525585	0.0724229	0.0809322
643	0	0.603664	0.247409	0.564938
644	0	0.528175	0.313086	0.288396
645	0	0.101869	0.248235	0.234143
646	0	0.340028	0.618891	0.525432
647	0	0.525959	0.59747	0.639482
648	0	0.458708	0.477238	0.499904
649	0	0.499269	0.326714	0.549516
650	0	0.567978	0.559756	0.551387
651	1	0.537142	0.701047	0.646515
652	1	0.0682423	0.450176	0.383823
653	1	0.635273	0.644412	0.622397
654	0	0.383118	0.53643	0.643852
655	1	0.673367	0.57203	0.651564
656	0	0.458694	0.586435	0.481406
657	0	0.395614	0.415979	0.56868
658	1	0.565391	0.633877	0.656482
659	1	0.457473	0.862959	0.833988
660	0	0.46964	0.0900378	0.178943
661	1	0.571955	0.747063	0.614264
662	0	0.66628	0.532864	0.49102
663	1	0.513894	0.509818	0.401226
664	1	0.749857	0.614744	0.519954
665	1	0.603451	0.637964	0.663089
666	1	0.655687	0.735513	0.797068
667	0	0.693725	0.453747	0.470939
668	1	0.165305	0.348105	0.413213
669	1	0.516576	0.740702	0.748496
670	0	0.585097	0.431836	0.465302
671	0	0.566132	0.72545	0.686525
672	1	0.658674	0.70413	0.612587
673	0	0.58608	0.225575	0.226223
674	0	0.554314	0.765408	0.718085
675	0	0.366462	0.08532	0.0680708
676	1	0.568578	0.716399	0.700644
677	0	0.421285	0.526651	0.478338
678	0	0.082269	0.279499	0.3498
679	0	0.586666	0.477842	0.604331
680	0	0.597331	0.706522	0.700973
681	0	0.564712	0.700456	0.663299
682	1	0.671462	0.829418	0.762845
683	1	0.707733	0.632016	0.584419
684	0	0.783899	0.635048	0.720314
685	0	0.347474	0.488327	0.568692
686	0	0.203035	0.0877964	0.0797417
687	0	0.646624	0.451672	0.456449
688	1	0.435976	0.444719	0.408699
689	0	0.0600058	0.276525	0.387879
690	0	0.0848937	0.193518	0.204554
691	0	0.360811	0.183296	0.214299
692	1	0.579545	0.892028	0.788279
693	0	0.478397	0.703784	0.653081
694	1	0.657502	0.596359	0.544193
695	1	0.345099	0.279438	0.274431
696	0	0.439194	0.516905	0.589353
697	0	0.64168	0.698766	0.749895
698	1	0.321835	0.696393	0.612424
699	0	0.391083	0.312169	0.287902
700	1	0.648145	0.718444	0.649438
701	1	0.681391	0.833826	0.728075
702	1	0.430451	0.579584	0.568905
703	1	0.673457	0.518406	0.611733
704	1	0.350078	0.530679	0.538015
705	0	0.594169	0.370485	0.375111
706	1	0.704702	0.800572	0.832507
707	1	0.517923	0.21198	0.184868
708	1	0.685472	0.198106	0.180905
709	0	0.639459	0.720144	0.665928
710	0	0.642184	0.638739	0.446954
711	1	0.588029	0.664471	0.68381
712	0	0.0344449	0.205938	0.288959
713	0	0.393352	0.314246	0.281062
714	0	0.265274	0.307835	0.224235
715	0	0.0678608	0.185982	0.250116
716	0	0.335154	0.424874	0.453515
717	0	0.481568	0.25382	0.239854
718	0	0.0177371	0.152779	0.226299
719	0	0.448468	0.492864	0.549818
720	0	0.627544	0.569006	0.54087
721	1	0.342999	0.436478	0.432384
722	1	0.690387	0.713999	0.70809
723	0	0.681787	0.594325	0.670276
724	1	0.602711	0.737507	0.729817
725	1	0.620528	0.75178	0.676735
726	1	0.704157	0.758436	0.715027
727	0	0.35837	0.305708	0.354796
728	1	0.516646	0.468712	0.353249
729	0	0.562008	0.304333	0.32149
730	1	0.362472	0.71043	0.699802
731	0	0.417254	0.0641136	0.153461
732	1	0.583851	0.457972	0.47424
733	1	0.317034	0.353794	0.309371
734	1	0.675223	0.738413	0.790153
735	1	0.708666	0.746022	0.722277
736	1	0.712005	0.700456	0.624892
737	0	0.458994	0.573885	0.543612
738	1	0.457937	0.662598	0.567861
739	0	0.075643	0.0872653	0.280768
740	0	0.416518	0.377545	0.409693
741	0	0.74613	0.715079	0.671836
742	0	0.651136	0.282592	0.432613
743	1	0.645033	0.635428	0.711535
744	0	0.222753	0.417415	0.444518
745	1	0.325812	0.422041	0.369094
746	1	0.668408	0.666176	0.667023
747	0	0.606389	0.469561	0.441403
748	0	0.592155	0.576132	0.638794
749	0	0.201707	0.288765	0.27682
750	1	0.720394	0.745305	0.685669
751	1	0.687382	0.749673	0.668459
752	0	0.355593	0.13316	0.140791
753	0	0.422647	0.140266	0.157855
754	1	0.196861	0.236149	0.278877
755	0	0.0252532	0.242936	0.267941
756	1	0.499248	0.512263	0.586238
757	0	0.638656	0.585705	0.606599
758	0	0.173263	0.107052	0.119284
759	1	0.587365	0.588853	0.499332
760	1	0.535371	0.527629	0.557602
761	1	0.677564	0.565318	0.493872
762	1	0.475517	0.57085	0.560541
763	0	0.283029	0.187127	0.178965
764	1	0.477521	0.753698	0.666048
765	0	0.413013	0.346115	0.2849
766	1	0.562329	0.238645	0.144269
767	0	0.184913	0.246583	0.375207
768	0	0.210452	0.156856	0.192475
769	0	0.483571	0.696657	0.589467
770	0	0.513705	0.36621	0.440038
771	0	0.53478	0.733461	0.664156
772	0	0.0427879	0.09355	0.155778
773	1	0.511245	0.348515	0.363047
774	1	0.636464	0.348793	0.367559
775	0	0.0614979	0.159	0.220368
776	1	0.620225	0.737456	0.687311
777	1	0.350597	0.31364	0.360879
778	1	0.69369	0.835057	0.799166
779	0	0.64597	0.217448	0.299098
780	0	0.254465	0.242384	0.181945
781	1	0.59806	0.397704	0.34353
782	0	0.0720271	0.270833	0.340199
783	0	0.521982	0.587859	0.584158
784	1	0.585018	0.666716	0.621643
785	0	0.638784	0.385553	0.345645
786	0	0.630209	0.540502	0.605429
787	0	0.54653	0.355937	0.461835
788	1	0.720648	0.659645	0.698577
789	0	0.475235	0.0789677	0.0677724
790	1	0.624254	0.736415	0.744602
791	0	0.60345	0.551395	0.492807
792	1	0.530032	0.677424	0.630956
793	0	0.608944	0.565321	0.51162
794	1	0.378755	0.570268	0.526507
795	0	0.0101827	0.133122	0.143
796	1	0.65515	0.680146	0.757698
797	0	0.145611	0.277511	0.306895
798	1	0.503644	0.650658	0.561092
799	1	0.381634	0.694738	0.596455
800	0	0.0566491	0.152356	0.226649
801	0	0.049487	0.224146	0.266599
802	0	0.368558	0.434247	0.623535
803	1	0.437857	0.565648	0.631065
804	0	0.600565	0.656613	0.607785
805	1	0.409747	0.510073	0.455562
806	1	0.480061	0.671772	0.631885
807	0	0.363119	0.580061	0.502993
808	1	0.476603	0.377627	0.399786
809	1	0.509637	0.574636	0.543922
810	1	0.704197	0.815058	0.792243
811	0	0.268408	0.391997	0.45167
812	0	0.204696	0.254206	0.270166
813	1	0.645759	0.859184	0.951897
814	1	0.538099	0.747046	0.755834
815	1	0.581673	0.4762	0.458282
816	0	0.549973	0.569303	0.531298
817	1	0.50221	0.388556	0.300357
818	0	0.528417	0.187949	0.174115
819	1	0.754177	0.690045	0.700067
820	1	0.609596	0.730808	0.65986
821	0	0.621732	0.299276	0.328977
822	1	0.267674	0.616052	0.485296
823	1	0.634226	0.72273	0.73397
824	1	0.342529	0.435219	0.545382
825	1	0.544988	0.521916	0.534014
826	0	0.230197	0.328815	0.354757
827	0	0.561655	0.805358	0.729447
828	1	0.318646	0.530037	0.569727
829	0	0.455914	0.825472	0.834809
830	1	0.323525	0.735682	0.714633
831	0	0.226138	0.303145	0.323021
832	0	0.654471	0.62579	0.508217
833	1	0.499628	0.240378	0.511282
834	1	0.59422	0.808704	0.781089
835	1	0.727549	0.754039	0.774318
836	1	0.581228	0.686797	0.707522
837	0	0.582914	0.333939	0.591547
838	1	0.631194	0.683568	0.719018
839	0	0.600218	0.654215	0.686047
840	1	0.587085	0.821377	0.715682
841	0	0.125373	0.144583	0.164423
842	0	0.415406	0.65914	0.682677
843	0	0.571611	0.648437	0.600553
844	0	0.723137	0.56437	0.604134
845	0	0.093169	0.456484	0.569125
846	1	0.650718	0.66791	0.623307
847	0	0.662945	0.662613	0.697198
848	0	0.372819	0.198171	0.32532
849	0	0.40655	0.281737	0.277885
850	0	0.110487	0.0923562	0.179822
851	1	0.196593	0.417084	0.452141
852	1	0.524162	0.5662	0.576598
853	1	0.66409	0.731058	0.739436
854	0	0.720974	0.731316	0.690385
855	1	0.536092	0.589284	0.551929
856	1	0.463952	0.73908	0.659418
857	0	0.509625	0.402425	0.385777
858	1	0.691106	0.72356	0.636289
859	0	0.66144	0.589723	0.616882
860	1	0.517024	0.595754	0.627635
861	1	0.0819513	0.523455	0.507299
862	0	0.701825	0.568071	0.562375
863	0	0.733418	0.641592	0.710636
864	0	0.603367	0.236956	0.201897
865	0	0.663024	0.81933	0.78612
866	1	0.295803	0.406948	0.466099
867	1	0.674746	0.796926	0.834562
868	0	0.296794	0.215784	0.266775
869	1	0.475325	0.374854	0.633333
870	1	0.3614	0.391169	0.369705
871	1	0.592252	0.603253	0.681291
872	1	0.522948	0.73278	0.725749
873	0	0.704894	0.831499	0.804527
874	0	0.684335	0.626081	0.509843
875	1	0.635608	0.758479	0.723862
876	1	0.722126	0.703614	0.59266
877	1	0.548987	0.607948	0.509321
878	1	0.621628	0.42788	0.430604
879	1	0.643758	0.721544	0.75973
880	0	0.352327	0.467072	0.543959
881	0	0.329896	0.19043	0.425454
882	0	0.0154399	0.233419	0.223192
883	1	0.694379	0.745176	0.666313
884	0	0.679395	0.669894	0.647048
885	1	0.603942	0.53303	0.440221
886	0	0.491855	0.592863	0.688606
887	1	0.54484	0.753804	0.819827
888	0	0.571796	0.749629	0.643918
889	0	0.0878989	0.560672	0.551198
890	0	0.223577	0.597058	0.60008
891	1	0.524501	0.46929	0.526416
892	0	0.394989	0.372676	0.32722
893	0	0.355822	0.0911087	0.219837
894	0	0.200469	0.335821	0.370792
895	0	0.318627	0.582653	0.549201
896	0	0.311298	0.49595	0.505907
897	0	0.642847	0.615128	0.586946
898	0	0.10024	0.312501	0.368978
899	0	0.311522	0.119713	0.0759137
900	0	0.233418	0.0980282	0.0789161
901	1	0.586175	0.482756	0.460872
902	0	0.400768	0.510622	0.399037
903	1	0.545709	0.53968	0.45977
904	0	0.547589	0.621769	0.727618
905	0	0.0596231	0.252872	0.246622
906	0	0.552264	0.468735	0.52283
907	1	0.701065	0.626197	0.68651
908	0	0.349919	0.336107	0.455341
909	0	0.167281	0.277213	0.358136
910	0	0.400457	0.420392	0.337889
911	0	0.620847	0.674786	0.762671
912	1	0.636645	0.834372	0.851697
913	1	0.292068	0.7205	0.604428
914	1	0.47018	0.559206	0.503618
915	0	0.4664	0.491907	0.52123
916	0	0.557876	0.760846	0.711417
917	0	0.379672	0.511794	0.517905
918	0	0.661093	0.63805	0.595323
919	1	0.635109	0.739211	0.662541
920	0	0.302191	0.18638	0.149066
921	1	0.740244	0.547264	0.755217
922	1	0.475414	0.743478	0.667678
923	0	0.115706	0.16986	0.149766
924	0	0.620251	0.410546	0.432302
925	0	0.517139	0.187545	0.276693
926	0	0.438208	0.601266	0.507069
927	0	0.623607	0.623516	0.607578
928	0	0.539809	0.546747	0.628376
929	0	0.0386576	0.0546538	0.0439402
930	0	0.607017	0.466324	0.677241
931	0	0.488987	0.33808	0.411277
932	0	0.470647	0.329642	0.34103
933	0	0.508428	0.627172	0.590958
934	0	0.239469	0.480122	0.378295
935	1	0.3635	0.483108	0.388427
936	0	0.0630047	0.235704	0.215492
937	0	0.535922	0.523497	0.559789
938	1	0.670879	0.611438	0.682279
939	0	0.691844	0.333416	0.401813
940	1	0.515664	0.630605	0.64432
941	0	0.340133	0.248959	0.330189
942	0	0.482995	0.457182	0.566985
943	0	0.24216	0.497018	0.514772
944	0	0.596529	0.375206	0.460529
945	0	0.019193	0.126706	0.121813
946	0	0.584529	0.672971	0.735019
947	0	0.432447	0.415462	0.461949
948	0	0.0154059	0.200448	0.21755
949	1	0.434511	0.413656	0.456199
950	0	0.714147	0.188524	0.202212
951	0	0.463247	0.426064	0.389238
952	1	0.606081	0.228394	0.262659
953	0	0.618215	0.681776	0.591239
954	0	0.412827	0.552587	0.597588
955	1	0.581331	0.385436	0.386548
956	0	0.494064	0.273077	0.223749
957	0	0.521139	0.549894	0.484198
958	0	0.639053	0.718106	0.745215
959	1	0.354735	0.632566	0.610177
960	1	0.320106	0.392181	0.370723
961	0	0.367265	0.391349	0.403006
962	0	0.0276522	0.420718	0.445523
963	0	0.339776	0.264115	0.239321
964	0	0.564328	0.342432	0.349521
965	0	0.121994	0.358314	0.357045
966	0	0.554284	0.541267	0.510044
967	1	0.701465	0.625584	0.666113
968	0	0.187739	0.49019	0.48323
969	0	0.288124	0.0397931	0.0756073
970	0	0.642141	0.424315	0.462622
971	0	0.613667	0.587892	0.558681
972	0	0.175294	0.36663	0.41781
973	0	0.105807	0.10455	0.0794605
974	0	0.601626	0.440359	0.441053
975	1	0.584412	0.528823	0.507477
976	1	0.589001	0.498601	0.509834
977	0	0.37762	0.623672	0.444225
978	0	0.520385	0.682735	0.69024
979	0	0.63214	0.23587	0.291373
980	1	0.588746	0.723544	0.723777
981	0	0.162802	0.345897	0.36216
982	0	0.220087	0.190406	0.246214
983	1	0.579351	0.393077	0.447674
984	1	0.465615	0.734946	0.584407
985	1	0.564022	0.326956	0.276397
986	0	0.0260187	0.0555207	0.121033
987	0	0.644051	0.440538	0.656561
988	1	0.659897	0.846514	0.882087
989	0	0.137734	0.309066	0.283521
990	0	0.322828	0.435792	0.413862
991	1	0.470073	0.641163	0.639225
992	1	0.490777	0.431811	0.511787
993	0	0.66493	0.858534	0.81252
994	1	0.610355	0.628092	0.727841
995	1	0.497648	0.613111	0.589568
996	0	0.548682	0.709894	0.709992
997	0	0.35438	0.527842	0.485103
998	0	0.643604	0.855703	0.762631
999	1	0.564176	0.776522	0.64596
1000	0	0.13329	0.567996	0.458662
1001	0	0.185154	0.0436317	0.0755636
1002	0	0.422686	0.598333	0.653955
1003	0	0.289363	0.237115	0.296465
1004	1	0.554245	0.662835	0.569382
1005	0	0.674493	0.710263	0.668121
1006	0	0.639788	0.410196	0.723892
1007	0	0.569344	0.387158	0.521359
1008	0	0.591488	0.259674	0.503157
1009	0	0.181206	0.319967	0.383605
1010	0	0.497623	0.409462	0.495695
1011	1	0.692358	0.747685	0.835068
1012	0	0.501271	0.457719	0.422469
1013	0	0.166619	0.44874	0.457815
1014	1	0.595827	0.771895	0.815485
1015	0	0.607091	0.0769542	0.0896025
1016	0	0.60492	0.354922	0.470851
1017	1	0.539886	0.746879	0.658936
1018	0	0.151419	0.198691	0.25001
1019	0	0.608475	0.354147	0.335588
1020	0	0.632166	0.483978	0.589454
1021	0	0.638743	0.40866	0.433531
1022	0	0.551809	0.613945	0.509429
1023	0	0.563823	0.422217	0.312404
1024	1	0.138466	0.295774	0.319952
1025	0	0.113949	0.231447	0.257706
1026	0	0.681507	0.62461	0.554969
1027	0	0.514399	0.231349	0.18247
1028	0	0.331715	0.430013	0.355434
1029	1	0.626265	0.676713	0.684235
1030	1	0.571221	0.745172	0.704102
1031	0	0.175997	0.222974	0.265436
1032	1	0.682532	0.52496	0.612578
1033	0	0.536406	0.593282	0.484066
1034	0	0.525958	0.607181	0.644294
1035	0	0.490944	0.244602	0.339948
1036	0	0.318859	0.337031	0.259931
1037	0	0.385748	0.480304	0.535923
1038	0	0.0320088	0.272105	0.229575
1039	0	0.65623	0.724854	0.66541
1040	0	0.493886	0.167752	0.182462
1041	1	0.584072	0.496862	0.538767
1042	0	0.653511	0.618806	0.497886
1043	0	0.426951	0.412912	0.419479
1044	0	0.241919	0.435489	0.428025
1045	0	0.411814	0.460479	0.523237
1046	0	0.331987	0.112172	0.174953
1047	0	0.35421	0.307746	0.325012
1048	0	0.0264597	0.144001	0.243344
1049	1	0.417582	0.62767	0.568973
1050	1	0.275702	0.332423	0.374686
1051	1	0.595558	0.811601	0.759442
1052	1	0.71104	0.712212	0.746338
1053	0	0.653811	0.456024	0.631742
1054	0	0.217931	0.176811	0.202324
1055	0	0.185251	0.350236	0.429865
1056	0	0.226608	0.227547	0.262234
1057	1	0.286446	0.678719	0.750479
1058	1	0.40342	0.539759	0.560007
1059	0	0.580045	0.30439	0.195916
1060	1	0.158491	0.272077	0.258844
1061	0	0.577538	0.632086	0.588011
1062	0	0.33137	0.649945	0.576539
1063	0	0.52434	0.575058	0.557287
1064	0	0.00629879	0.187957	0.236858
1065	1	0.407893	0.375622	0.320401
1066	0	0.662559	0.662043	0.626437
1067	0	0.250883	0.378701	0.380746
1068	0	0.519311	0.753284	0.624271
1069	1	0.546581	0.339216	0.411036
1070	1	0.50397	0.382095	0.309645
1071	1	0.651463	0.411189	0.549363
1072	0	0.0945831	0.67966	0.51623
1073	0	0.402619	0.194548	0.405023
1074	0	0.0886875	0.260342	0.265438
1075	0	0.342525	0.128717	0.134648
1076	0	0.538284	0.445146	0.562857
1077	0	0.592582	0.647515	0.639398
1078	0	0.0939697	0.413749	0.33281
1079	0	0.512617	0.595482	0.50607
1080	0	0.36684	0.591551	0.466596
1081	1	0.0938192	0.74119	0.393204
1082	0	0.399114	0.633018	0.493828
1083	0	0.616608	0.31054	0.472087
1084	0	0.580692	0.365521	0.31181
1085	0	0.535633	0.407113	0.482364
1086	0	0.193504	0.272228	0.245247
1087	0	0.122985	0.520436	0.57465
1088	0	0.0740972	0.138712	0.145897
1089	0	0.523994	0.677306	0.568034
1090	1	0.649965	0.69451	0.558366
1091	0	0.326912	0.544366	0.449245
1092	0	0.103604	0.371503	0.472762
1093	0	0.259738	0.292205	0.171403
1094	0	0.538429	0.773065	0.750397
1095	0	0.222286	0.226643	0.20937
1096	0	0.321814	0.495331	0.529399
1097	0	0.542753	0.413484	0.404524
1098	0	0.475635	0.361799	0.395895
1099	0	0.62931	0.575019	0.542826
1100	0	0.56972	0.748255	0.887935
1101	0	0.67467	0.163058	0.318483
1102	1	0.391308	0.697055	0.751682
1103	0	0.0104814	0.102054	0.153377
1104	0	0.050864	0.303077	0.348881
1105	1	0.603836	0.764107	0.774194
1106	0	0.534957	0.573715	0.625069
1107	0	0.170929	0.151336	0.117689
1108	0	0.378035	0.492514	0.45534
1109	0	0.127702	0.320099	0.362788
1110	0	0.0579442	0.179406	0.243591
1111	0	0.255771	0.470912	0.501596
1112	0	0.0223715	0.0871463	0.140795
1113	0	0.421935	0.49837	0.458955
1114	0	0.488484	0.612579	0.608555
1115	0	0.57458	0.789445	0.765375
1116	1	0.61712	0.718949	0.66833
1117	1	0.507688	0.596733	0.605921
1118	0	0.289599	0.276713	0.26537
1119	0	0.0416492	0.334363	0.237804
1120	1	0.673239	0.347919	0.314214
1121	0	0.123524	0.316515	0.394279
1122	0	0.614642	0.307584	0.295345
1123	1	0.619774	0.687287	0.73179
1124	0	0.506838	0.222959	0.384022
1125	0	0.116169	0.302993	0.322535
1126	0	0.508426	0.750168	0.777118
1127	0	0.0111278	0.114702	0.15008
1128	0	0.36604	0.175816	0.166184
1129	0	0.142843	0.270542	0.36598
1130	0	0.648663	0.725647	0.701225
1131	1	0.548492	0.721537	0.733256
1132	0	0.397995	0.254698	0.317322
1133	0	0.231173	0.38103	0.442473
1134	0	0.442226	0.484249	0.464551
1135	0	0.194207	0.287087	0.301535
1136	0	0.558356	0.30901	0.41497
1137	1	0.690479	0.587352	0.573567
1138	0	0.0988373	0.266535	0.258932
1139	1	0.648311	0.639527	0.718279
1140	0	0.298507	0.522134	0.531573
1141	0	0.346667	0.63387	0.641262
1142	1	0.447314	0.649952	0.691089
1143	0	0.247923	0.261483	0.11037
1144	0	0.359364	0.561604	0.551404
1145	0	0.263337	0.0880452	0.206094
1146	0	0.332758	0.291321	0.22148
1147	1	0.349002	0.382581	0.261437
1148	0	0.607193	0.43603	0.464385
1149	0	0.359547	0.437672	0.426794
1150	0	0.172119	0.382867	0.458716
1151	0	0.374715	0.604503	0.596598
1152	0	0.701078	0.752284	0.709789
1153	1	0.628484	0.589851	0.684013
1154	0	0.361114	0.613244	0.582888
1155	0	0.654969	0.266156	0.289913
1156	1	0.387459	0.613762	0.620926
1157	1	0.681069	0.730816	0.673968
1158	1	0.292486	0.0380204	0.089768
1159	0	0.538233	0.540807	0.576973
1160	1	0.373626	0.693218	0.608
1161	0	0.205329	0.581762	0.670573
1162	0	0.64539	0.670115	0.662144
1163	0	0.541483	0.745948	0.635438
1164	0	0.48476	0.421714	0.56662
1165	1	0.526295	0.384149	0.437023
1166	1	0.676564	0.609953	0.61117
1167	1	0.230814	0.696082	0.652235
1168	0	0.0580912	0.205952	0.244093
1169	0	0.248771	0.162704	0.136867
1170	0	0.339408	0.614335	0.669
1171	0	0.652256	0.533979	0.573359
1172	1	0.267027	0.62683	0.623222
1173	0	0.593796	0.62625	0.718271
1174	1	0.392401	0.175837	0.198882
1175	0	0.376802	0.219473	0.264954
1176	0	0.198005	0.383238	0.460749
1177	1	0.487372	0.425813	0.385955
1178	0	0.724704	0.258836	0.495666
1179	1	0.712049	0.629566	0.624793
1180	1	0.55056	0.509603	0.649902
1181	0	0.167727	0.257445	0.315963
1182	0	0.00383306	0.174085	0.234111
1183	0	0.388867	0.462818	0.457744
1184	0	0.59084	0.778144	0.777392
1185	0	0.259617	0.21704	0.296119
1186	0	0.0116442	0.105726	0.210022
1187	0	0.56491	0.468955	0.531551
1188	0	0.486217	0.601214	0.577874
1189	0	0.446036	0.337437	0.561244
1190	0	0.421075	0.70405	0.583443
1191	1	0.549627	0.708997	0.615526
1192	0	0.0104146	0.0494195	0.051305
1193	1	0.412566	0.646305	0.57849
1194	1	0.463673	0.466595	0.527237
1195	0	0.426765	0.299817	0.52846
1196	1	0.545797	0.614525	0.62074
1197	0	0.28671	0.314967	0.312518
1198	0	0.14507	0.390494	0.458171
1199	1	0.440752	0.852333	0.841171
1200	0	0.162282	0.299898	0.364615
1201	0	0.0507486	0.424557	0.463237
1202	0	0.503181	0.480273	0.536805
1203	1	0.665732	0.37605	0.544208
1204	1	0.544441	0.709272	0.585503
1205	1	0.628028	0.772306	0.653407
1206	0	0.594155	0.593417	0.619328
1207	1	0.322563	0.50322	0.508926
1208	0	0.529495	0.254666	0.161294
1209	0	0.512399	0.65535	0.665399
1210	0	0.217353	0.512449	0.482561
1211	1	0.193673	0.345759	0.4384
1212	0	0.528043	0.589902	0.543739
1213	0	0.300318	0.32581	0.312019
1214	0	0.11563	0.597945	0.449033
1215	0	0.643639	0.268462	0.477623
1216	0	0.251238	0.649869	0.605175
1217	0	0.621503	0.356355	0.373079
1218	0	0.460833	0.703954	0.716951
1219	1	0.668072	0.72369	0.611159
1220	0	0.614509	0.605316	0.648411
1221	0	0.611552	0.737339	0.67541
1222	0	0.160521	0.172324	0.316377
1223	0	0.124588	0.210939	0.299059
1224	0	0.0780208	0.292825	0.401915
1225	0	0.580512	0.536662	0.515013
1226	0	0.10727	0.686798	0.622576
1227	0	0.186307	0.3692	0.41795
1228	1	0.622364	0.1432	0.17616
1229	1	0.673134	0.837997	0.803888
1230	0	0.604113	0.689875	0.699674
1231	0	0.698233	0.421888	0.4519
1232	0	0.45378	0.409839	0.476755
1233	0	0.277402	0.212951	0.582997
1234	0	0.195401	0.367606	0.398342
1235	0	0.112874	0.147526	0.108822
1236	0	0.654782	0.740352	0.702414
1237	0	0.0684047	0.108294	0.12493
1238	0	0.0315561	0.402655	0.373417
1239	0	0.582313	0.670045	0.638964
1240	0	0.200333	0.429389	0.265212
1241	0	0.552366	0.312956	0.275252
1242	0	0.481941	0.536562	0.501016
1243	0	0.0191145	0.215342	0.375827
1244	0	0.0875788	0.239598	0.220018
1245	0	0.362532	0.215393	0.29979
1246	0	0.206747	0.275148	0.33818
1247	1	0.588797	0.716747	0.743029
1248	0	0.619375	0.656886	0.6658
1249	1	0.668072	0.785895	0.715789
1250	0	0.702292	0.627766	0.609163
1251	1	0.624517	0.605106	0.731628
1252	0	0.605589	0.394199	0.289036
1253	0	0.616543	0.672153	0.648166
1254	0	0.0111471	0.241339	0.30924
1255	0	0.183613	0.283841	0.317369
1256	0	0.172966	0.468052	0.585401
1257	0	0.0754322	0.515777	0.526642
1258	1	0.530991	0.721707	0.631708
1259	1	0.308378	0.560846	0.556354
1260	1	0.47872	0.489072	0.551736
1261	1	0.19944	0.459157	0.472284
1262	0	0.546513	0.632833	0.647644
1263	0	0.525896	0.612357	0.564755
1264	0	0.376028	0.116091	0.161613
1265	0	0.454357	0.311805	0.101876
1266	0	0.537337	0.681289	0.653564
1267	0	0.5681	0.488745	0.393633
1268	1	0.622804	0.755657	0.719356
1269	1	0.54614	0.773866	0.771695
1270	0	0.0153444	0.0651305	0.049727
1271	0	0.362884	0.563152	0.493874
1272	0	0.285619	0.0952025	0.0575886
1273	0	0.254841	0.629274	0.619287
1274	0	0.284379	0.676029	0.54129
1275	0	0.395346	0.107682	0.0988446
1276	0	0.345636	0.109219	0.247319
1277	1	0.488363	0.461192	0.344118
1278	0	0.326773	0.514429	0.4926
1279	0	0.65646	0.535252	0.531516
1280	0	0.156196	0.265147	0.25484
1281	0	0.610983	0.477167	0.776252
1282	0	0.0751928	0.238468	0.255074
1283	1	0.630354	0.681933	0.702293
1284	0	0.37129	0.568403	0.570316
1285	0	0.0349228	0.0802237	0.0887113
1286	1	0.383499	0.64924	0.633055
1287	0	0.613406	0.41187	0.334253
1288	0	0.523153	0.213751	0.209405
1289	1	0.674099	0.845981	0.853011
1290	1	0.263762	0.546002	0.58553
1291	0	0.476075	0.199236	0.235643
1292	1	0.362676	0.708111	0.682109
1293	0	0.100176	0.360718	0.355349
1294	0	0.560986	0.412429	0.462096
1295	1	0.460331	0.393177	0.49666
1296	0	0.0459421	0.333711	0.355782
1297	0	0.619782	0.317661	0.263312
1298	0	0.51626	0.234873	0.460177
1299	1	0.290527	0.703407	0.656383
1300	0	0.36227	0.583978	0.453303
1301	1	0.609774	0.804905	0.818689
1302	0	0.641539	0.702513	0.54607
1303	0	0.667048	0.479527	0.777997
1304	0	0.287035	0.326557	0.484884
1305	1	0.343655	0.531517	0.492632
1306	0	0.0552639	0.290684	0.325687
1307	1	0.216622	0.52262	0.457077
1308	0	0.329108	0.317554	0.158933
1309	0	0.0220941	0.142138	0.14299
1310	0	0.687717	0.787117	0.700272
1311	0	0.253982	0.621209	0.519499
1312	0	0.593997	0.547983	0.525484
1313	1	0.27995	0.51376	0.392071
1314	0	0.334886	0.654698	0.536237
1315	0	0.308513	0.477308	0.373801
1316	1	0.301824	0.653533	0.583537
1317	0	0.266117	0.498855	0.55148
1318	0	0.0274699	0.12097	0.173529
1319	0	0.317402	0.416688	0.334914
1320	0	0.40272	0.539773	0.485571
1321	1	0.26646	0.626259	0.636929
1322	1	0.640984	0.712972	0.69589
1323	0	0.691188	0.792455	0.715152
1324	1	0.502533	0.59621	0.653399
1325	0	0.672304	0.723676	0.704205
1326	0	0.296726	0.215065	0.242606
1327	1	0.579606	0.509045	0.478418
1328	0	0.222175	0.38211	0.3761
1329	0	0.485129	0.17242	0.15945
1330	0	0.0954603	0.281251	0.330575
1331	1	0.0261074	0.299741	0.368088
1332	0	0.018988	0.155321	0.190285
1333	0	0.567806	0.230015	0.285778
1334	1	0.328206	0.584765	0.553678
1335	0	0.493892	0.657158	0.378546
1336	0	0.346495	0.409185	0.376615
1337	0	0.615884	0.678373	0.559019
1338	0	0.614085	0.639221	0.635726
1339	0	0.510051	0.525027	0.492431
1340	0	0.276665	0.300406	0.404533
1341	0	0.227543	0.374755	0.519297
1342	1	0.655471	0.746433	0.654412
1343	1	0.28986	0.58772	0.621235
1344	0	0.394857	0.712849	0.614876
1345	1	0.297807	0.688058	0.708908
1346	0	0.610899	0.678805	0.645524
1347	0	0.0460537	0.275231	0.247194
1348	1	0.583591	0.325081	0.321083
1349	0	0.446039	0.309294	0.338494
1350	1	0.332927	0.187025	0.158065
1351	1	0.361406	0.659346	0.565226
1352	0	0.349091	0.453988	0.372742
1353	0	0.724989	0.211849	0.279231
1354	0	0.0735251	0.117213	0.119729
1355	1	0.653571	0.641339	0.699371
1356	0	0.504344	0.214617	0.368403
1357	0	0.387427	0.262716	0.61732
1358	0	0.363204	0.351126	0.301033
1359	1	0.578075	0.676509	0.617232
1360	0	0.47636	0.526187	0.596385
1361	1	0.519603	0.670094	0.687598
1362	0	0.0262361	0.112056	0.143402
1363	1	0.58478	0.63287	0.7154
1364	1	0.36314	0.41853	0.42062
1365	0	0.686937	0.475744	0.348389
1366	0	0.0543208	0.249899	0.26403
1367	1	0.634654	0.863284	0.806035
1368	1	0.653976	0.836035	0.850498
1369	0	0.031728	0.14467	0.1078
1370	0	0.0839555	0.49217	0.424143
1371	0	0.371203	0.234781	0.211563
1372	0	0.637018	0.589436	0.663202
1373	0	0.600937	0.290025	0.657174
1374	0	0.0564739	0.448777	0.492902
1375	1	0.143575	0.286707	0.22415
1376	1	0.652846	0.853903	0.808001
1377	0	0.0399886	0.418661	0.475833
1378	0	0.540327	0.2714	0.395724
1379	1	0.677897	0.777834	0.666647
1380	0	0.178311	0.162756	0.280348
1381	0	0.302472	0.178047	0.316928
1382	1	0.58317	0.636868	0.651089
1383	0	0.40939	0.206161	0.293695
1384	0	0.722641	0.351414	0.326087
1385	1	0.576158	0.777417	0.809542
1386	0	0.249003	0.347234	0.305409
1387	1	0.689174	0.763665	0.782957
1388	0	0.226781	0.780474	0.748863
1389	0	0.203392	0.407237	0.454598
1390	1	0.608281	0.757681	0.734012
1391	0	0.174775	0.130863	0.226165
1392	1	0.423399	0.446291	0.42541
1393	0	0.0716753	0.212234	0.22094
1394	1	0.395252	0.693381	0.575087
1395	1	0.551865	0.587269	0.519755
1396	0	0.554348	0.284188	0.309062
1397	0	0.100844	0.421892	0.446983
1398	0	0.255771	0.528215	0.527672
1399	1	0.599967	0.633021	0.454683
1400	1	0.39506	0.422113	0.487817
1401	1	0.65015	0.738711	0.717095
1402	0	0.568273	0.459502	0.467486
1403	0	0.182476	0.373889	0.375382
1404	0	0.265328	0.30575	0.275238
1405	0	0.00822717	0.341215	0.347055
1406	0	0.183741	0.347279	0.935613
1407	0	0.630535	0.540834	0.559586
1408	0	0.565698	0.767672	0.697886
1409	1	0.469443	0.521877	0.55948
1410	0	0.267155	0.0759823	0.0631138
1411	1	0.537465	0.625522	0.675626
1412	0	0.277721	0.642717	0.668344
1413	0	0.108328	0.165661	0.208775
1414	1	0.249463	0.58022	0.553453
1415	1	0.572006	0.277617	0.416349
1416	0	0.561846	0.226261	0.331153
1417	0	0.572762	0.622022	0.664809
1418	0	0.711127	0.717771	0.678541
1419	0	0.532559	0.623888	0.54146
1420	0	0.520159	0.367103	0.421079
1421	0	0.488806	0.346865	0.394829
1422	0	0.652188	0.332376	0.619742
1423	1	0.402556	0.537183	0.558637
1424	0	0.212392	0.412185	0.416167
1425	1	0.0952292	0.721237	0.671698
1426	0	0.118186	0.289581	0.338912
1427	0	0.193043	0.244467	0.240465
1428	1	0.56306	0.303909	0.255818
1429	0	0.481239	0.310927	0.228608
1430	0	0.0126975	0.142114	0.207705
1431	0	0.0694001	0.392323	0.442705
1432	1	0.607546	0.769026	0.741744
1433	1	0.245583	0.583118	0.574102
1434	1	0.267141	0.66328	0.565174
1435	0	0.631628	0.284819	0.496329
1436	1	0.615755	0.812479	0.755721
1437	1	0.0988636	0.562357	0.46088
1438	1	0.686635	0.773375	0.758932
1439	1	0.659547	0.715572	0.724931
1440	0	0.565103	0.149582	0.188804
1441	0	0.0487016	0.215459	0.218756
1442	0	0.153257	0.215464	0.261361
1443	0	0.642485	0.807041	0.782746
1444	1	0.46246	0.429701	0.523875
1445	0	0.024474	0.187842	0.262644
1446	1	0.627914	0.805993	0.861814
1447	0	0.1572	0.256437	0.483886
1448	0	0.0678953	0.116875	0.143764
1449	0	0.630373	0.320114	0.388198
1450	0	0.351538	0.147767	0.336584
1451	0	0.107702	0.102699	0.104089
1452	1	0.645206	0.725704	0.643315
1453	0	0.463124	0.288957	0.197433
1454	1	0.676465	0.705547	0.68625
1455	1	0.604659	0.78981	0.787787
1456	0	0.689638	0.637037	0.691999
1457	1	0.485584	0.594198	0.494382
1458	0	0.127769	0.440939	0.482109
1459	0	0.493293	0.527129	0.46574
1460	0	0.513325	0.45208	0.539743
1461	0	0.388047	0.288738	0.304592
1462	0	0.517219	0.452398	0.472931
1463	0	0.523087	0.370118	0.35935
1464	0	0.447943	0.637432	0.482946
1465	1	0.584263	0.82293	0.755275
1466	0	0.469967	0.459162	0.507932
1467	0	0.53373	0.654869	0.546887
1468	0	0.158445	0.200276	0.37891
1469	0	0.486791	0.212822	0.223945
1470	0	0.0267125	0.184004	0.192627
1471	0	0.0817825	0.332927	0.398819
1472	0	0.36014	0.370922	0.422456
1473	0	0.0900984	0.357526	0.437407
1474	1	0.543888	0.708591	0.782652
1475	1	0.566764	0.763292	0.625508
1476	0	0.613928	0.561822	0.536691
1477	0	0.482428	0.471078	0.585785
1478	0	0.511225	0.587825	0.54197
1479	0	0.604088	0.15762	0.132129
1480	0	0.567498	0.61304	0.647483
1481	0	0.0520396	0.152269	0.310917
1482	1	0.554894	0.496005	0.521348
1483	1	0.319057	0.683291	0.574971
1484	0	0.117412	0.319632	0.366971
1485	0	0.00578952	0.192486	0.231519
1486	0	0.175299	0.403644	0.399261
1487	1	0.466724	0.579475	0.568077
1488	1	0.234857	0.43939	0.373507
1489	1	0.561589	0.437352	0.595303
1490	0	0.492822	0.0825571	0.293527
1491	0	0.624607	0.716436	0.623632
1492	1	0.644955	0.676637	0.698944
1493	0	0.0424421	0.399147	0.353388
1494	0	0.456917	0.483162	0.649911
1495	0	0.0805605	0.389309	0.450854
1496	1	0.503019	0.387773	0.368382
1497	1	0.622749	0.501715	0.441542
1498	1	0.491503	0.585354	0.629297
1499	1	0.573375	0.768532	0.714816
1500	0	0.298262	0.137075	0.0745578
1501	0	0.254544	0.14927	0.321819
1502	0	0.586006	0.674279	0.604312
1503	1	0.524133	0.563233	0.59857
1504	0	0.290255	0.349348	0.374515
1505	0	0.681885	0.247275	0.401503
1506	1	0.545463	0.630117	0.593611
1507	0	0.0457887	0.404184	0.370322
1508	1	0.721638	0.735439	0.75776
1509	0	0.368372	0.244437	0.258465
1510	0	0.554631	0.359868	0.338788
1511	1	0.125731	0.478316	0.349419
1512	0	0.689367	0.274149	0.380807
1513	1	0.559175	0.479889	0.513221
1514	1	0.63674	0.835994	0.806967
1515	1	0.443309	0.441514	0.422331
1516	1	0.374266	0.798811	0.739562
1517	0	0.0150583	0.0821831	0.0796859
1518	0	0.00490666	0.146131	0.189669
1519	0	0.309845	0.473402	0.472325
1520	0	0.215985	0.279087	0.280406
1521	0	0.236913	0.321836	0.382863
1522	0	0.138381	0.347425	0.392968
1523	0	0.267009	0.442622	0.408499
1524	1	0.490315	0.519867	0.501035
1525	0	0.0255396	0.201025	0.248797
1526	0	0.459771	0.498178	0.558046
1527	0	0.365767	0.135854	0.139414
1528	0	0.588614	0.773923	0.621137
1529	0	0.122007	0.275972	0.361208
1530	1	0.584297	0.644242	0.563784
1531	1	0.148986	0.217773	0.286234
1532	0	0.397711	0.277979	0.267769
1533	1	0.424428	0.54	0.456715
1534	0	0.0960162	0.356398	0.291876
1535	0	0.38358	0.46653	0.473004
1536	1	0.52753	0.670128	0.618698
1537	0	0.447817	0.208851	0.291091
1538	1	0.273822	0.528972	0.483746
1539	0	0.520954	0.428774	0.503909
1540	0	0.452651	0.121501	0.437028
1541	0	0.462087	0.196582	0.204917
1542	1	0.753501	0.866414	0.842186
1543	0	0.523533	0.538382	0.579355
1544	1	0.50427	0.625747	0.593028
1545	1	0.614041	0.583083	0.624722
1546	1	0.489148	0.472086	0.524295
1547	0	0.067452	0.287134	0.254177
1548	1	0.598252	0.749497	0.708204
1549	0	0.583467	0.761235	0.718899
1550	0	0.345196	0.403313	0.511046
1551	1	0.135291	0.705669	0.587233
1552	0	0.559885	0.555708	0.585982
1553	0	0.258977	0.20249	0.223903
1554	0	0.608206	0.459785	0.529103
1555	1	0.594965	0.666203	0.719382
1556	1	0.58925	0.776016	0.729883
1557	0	0.501864	0.472908	0.510886
1558	0	0.501747	0.480644	0.584167
1559	1	0.459176	0.586108	0.603943
1560	1	0.681207	0.738545	0.763938
1561	0	0.176612	0.197114	0.250391
1562	0	0.261898	0.303159	0.337475
1563	0	0.0293523	0.356766	0.427934
1564	1	0.504106	0.672348	0.710594
1565	1	0.242984	0.560914	0.60681
1566	1	0.720104	0.73695	0.714337
1567	0	0.131903	0.344418	0.326753
1568	0	0.137809	0.342729	0.237737
1569	1	0.162305	0.241572	0.346017
1570	0	0.48828	0.214745	0.227309
1571	0	0.430832	0.317601	0.238469
1572	0	0.203599	0.315918	0.327028
1573	0	0.216069	0.394996	0.460595
1574	0	0.436674	0.622241	0.636517
1575	0	0.660312	0.566821	0.655131
1576	0	0.677261	0.750673	0.686043
1577	0	0.620078	0.597346	0.671036
1578	1	0.648396	0.598434	0.655817
1579	0	0.185752	0.24664	0.229066
1580	0	0.684937	0.289707	0.426062
1581	0	0.477559	0.335198	0.491276
1582	1	0.609493	0.761352	0.722691
1583	0	0.0125843	0.429479	0.40866
1584	1	0.278485	0.746855	0.729469
1585	0	0.0469599	0.272449	0.253667
1586	0	0.0359146	0.0322967	0.0504867
1587	0	0.603146	0.672065	0.60382
1588	0	0.283582	0.289323	0.360564
1589	0	0.042094	0.150168	0.144907
1590	0	0.575668	0.78063	0.726131
1591	1	0.537278	0.72555	0.674539
1592	0	0.606578	0.826033	0.777822
1593	0	0.526343	0.47497	0.346562
1594	0	0.67949	0.665974	0.670788
1595	0	0.661427	0.417728	0.581767
1596	0	0.107683	0.203066	0.383306
1597	0	0.416948	0.140208	0.137447
1598	1	0.312214	0.748508	0.802427
1599	0	0.0190327	0.383262	0.345166
1600	1	0.663587	0.47439	0.447076
1601	0	0.00577353	0.0475982	0.05529
1602	0	0.122334	0.140945	0.289004
1603	0	0.222767	0.514011	0.424604
1604	1	0.0698653	0.112455	0.100793
1605	0	0.315185	0.493108	0.421079
1606	0	0.116693	0.612976	0.449365
1607	0	0.608161	0.798707	0.708725
1608	0	0.324065	0.179401	0.187629
1609	0	0.466248	0.647104	0.609207
1610	1	0.406142	0.328507	0.303767
1611	0	0.724487	0.414187	0.491738
1612	0	0.420857	0.298796	0.422315
1613	0	0.38822	0.47585	0.381441
1614	0	0.374327	0.287101	0.214012
1615	0	0.553951	0.596666	0.634598
1616	1	0.300717	0.465793	0.369686
1617	0	0.540853	0.456618	0.425687
1618	1	0.13545	0.657173	0.481517
1619	0	0.162864	0.231847	0.311756
1620	1	0.349941	0.431759	0.480826
1621	0	0.106968	0.267215	0.332344
1622	0	0.117388	0.16181	0.20386
1623	0	0.516106	0.524528	0.551878
1624	0	0.0819417	0.364528	0.366478
1625	0	0.408037	0.527181	0.468893
1626	0	0.500613	0.276713	0.208986
1627	1	0.340524	0.382625	0.335138
1628	0	0.392911	0.240884	0.354492
1629	0	0.553797	0.683369	0.737071
1630	0	0.679745	0.634977	0.500896
1631	1	0.628853	0.708766	0.675087
1632	0	0.550078	0.588175	0.518563
1633	1	0.363023	0.337725	0.346359
1634	0	0.0617424	0.0680135	0.0583344
1635	0	0.0358379	0.105686	0.105438
1636	1	0.612734	0.704196	0.656561
1637	1	0.590242	0.493046	0.405706
1638	0	0.519221	0.451033	0.450703
1639	0	0.0335536	0.118111	0.14763
1640	0	0.700075	0.65527	0.725794
1641	0	0.563757	0.317156	0.50257
1642	0	0.387619	0.782743	0.704291
1643	0	0.12555	0.286159	0.33664
1644	1	0.508092	0.643813	0.650135
1645	0	0.548556	0.348357	0.442125
1646	0	0.456753	0.217261	0.114547
1647	1	0.303424	0.504994	0.570988
1648	1	0.570781	0.730632	0.735257
1649	0	0.335074	0.46012	0.467968
1650	0	0.410794	0.576996	0.525409
1651	1	0.711785	0.79776	0.771649
1652	0	0.0110153	0.109792	0.113272
1653	0	0.310969	0.594679	0.603097
1654	1	0.521724	0.759913	0.779175
1655	0	0.491412	0.515538	0.497581
1656	0	0.172334	0.091103	0.0674599
1657	1	0.430344	0.375991	0.362099
1658	0	0.229727	0.408744	0.33323
1659	0	0.390943	0.191215	0.140532
1660	0	0.402169	0.272886	0.279414
1661	0	0.00484121	0.189875	0.212285
1662	0	0.605954	0.535202	0.472213
1663	0	0.538327	0.428342	0.599127
1664	0	0.280685	0.531575	0.450605
1665	0	0.696593	0.501144	0.398947
1666	0	0.050381	0.398361	0.306183
1667	1	0.574168	0.715409	0.629683
1668	0	0.56671	0.686456	0.667516
1669	0	0.514268	0.583181	0.597543
1670	0	0.582012	0.5784	0.655128
1671	0	0.186895	0.353525	0.297682
1672	0	0.369609	0.558128	0.57059
1673	1	0.337375	0.510509	0.557468
1674	0	0.448758	0.232116	0.164418
1675	1	0.623473	0.669239	0.625617
1676	0	0.63531	0.36826	0.645827
1677	0	0.363424	0.309378	0.338161
1678	0	0.587976	0.799309	0.739705
1679	0	0.531139	0.281088	0.535048
1680	0	0.0645131	0.252794	0.248508
1681	0	0.669724	0.396246	0.399938
1682	0	0.484006	0.344106	0.600746
1683	0	0.642002	0.562015	0.49716
1684	1	0.535934	0.644268	0.676742
1685	0	0.330173	0.382928	0.385643
1686	0	0.142982	0.33885	0.342192
1687	0	0.443326	0.578784	0.504758
1688	0	0.0184121	0.163734	0.237693
1689	0	0.622625	0.793287	0.69123
1690	0	0.177439	0.311029	0.215048
1691	1	0.417594	0.774014	0.683552
1692	0	0.512843	0.471934	0.473188
1693	1	0.352815	0.444247	0.394356
1694	0	0.404166	0.591518	0.558622
1695	0	0.509894	0.621771	0.551942
1696	0	0.612905	0.741724	0.686592
1697	1	0.251496	0.326483	0.359838
1698	0	0.501951	0.413947	0.600537
1699	1	0.711733	0.70269	0.682038
1700	0	0.602773	0.380113	0.357084
1701	0	0.69263	0.282427	0.463494
1702	0	0.0367289	0.0445022	0.0257301
1703	1	0.446938	0.747732	0.717946
1704	0	0.226206	0.572307	0.47617
1705	0	0.354611	0.418677	0.347937
1706	0	0.17889	0.382795	0.376562
1707	0	0.517797	0.16701	0.14127
1708	0	0.412618	0.400493	0.386405
1709	0	0.386412	0.194805	0.157874
1710	0	0.329462	0.252848	0.287929
1711	0	0.642125	0.787445	0.743388
1712	0	0.641455	0.80636	0.779405
1713	0	0.381898	0.0715186	0.084932
1714	0	0.410057	0.447611	0.436067
1715	0	0.319638	0.478965	0.429018
1716	0	0.146852	0.316745	0.300935
1717	0	0.253846	0.319149	0.328356
1718	0	0.532499	0.519705	0.529045
1719	0	0.416534	0.421527	0.430518
1720	0	0.345335	0.201591	0.159595
1721	0	0.658063	0.695188	0.668481
1722	0	0.07163	0.141352	0.097111
1723	0	0.037639	0.341413	0.373799
1724	0	0.489665	0.516191	0.488754
1725	0	0.275975	0.179905	0.189776
1726	0	0.464377	0.562892	0.5589
1727	0	0.342095	0.0820685	0.246169
1728	0	0.0979125	0.393776	0.257275
1729	0	0.212223	0.310341	0.391195
1730	0	0.544451	0.781053	0.683596
1731	0	0.0943913	0.376208	0.451734
1732	0	0.427013	0.521478	0.510268
1733	0	0.0166336	0.18256	0.20508
1734	0	0.460511	0.322795	0.363041
1735	1	0.137239	0.502515	0.375027
1736	0	0.254051	0.461282	0.439726
1737	0	0.199959	0.194776	0.243546
1738	0	0.55501	0.637819	0.62926
1739	0	0.37176	0.217007	0.151997
1740	0	0.546581	0.383157	0.3573
1741	0	0.433381	0.306867	0.328231
1742	1	0.634993	0.719553	0.727442
1743	0	0.0153519	0.530323	0.410852
1744	0	0.222877	0.426226	0.417499
1745	1	0.620847	0.786825	0.740306
1746	0	0.593763	0.791442	0.81241
1747	0	0.652293	0.69818	0.594269
1748	0	0.610205	0.513495	0.508525
1749	0	0.691656	0.703601	0.450716
1750	1	0.309247	0.54769	0.517647
1751	1	0.322594	0.599346	0.530736
1752	1	0.588518	0.79571	0.745294
1753	0	0.433453	0.35254	0.335979
1754	0	0.504443	0.548466	0.581747
1755	0	0.735178	0.574811	0.659913
1756	0	0.554723	0.580817	0.645178
1757	0	0.625456	0.788112	0.689451
1758	0	0.163928	0.0427515	0.0409096
