# Supplementary figures and images for: Development and evaluation of a live birth prediction model for evaluating human blastocysts from a retrospective study
Source: eLife journal article supplement (doi:10.7554/elife.83662), 2023-02-21

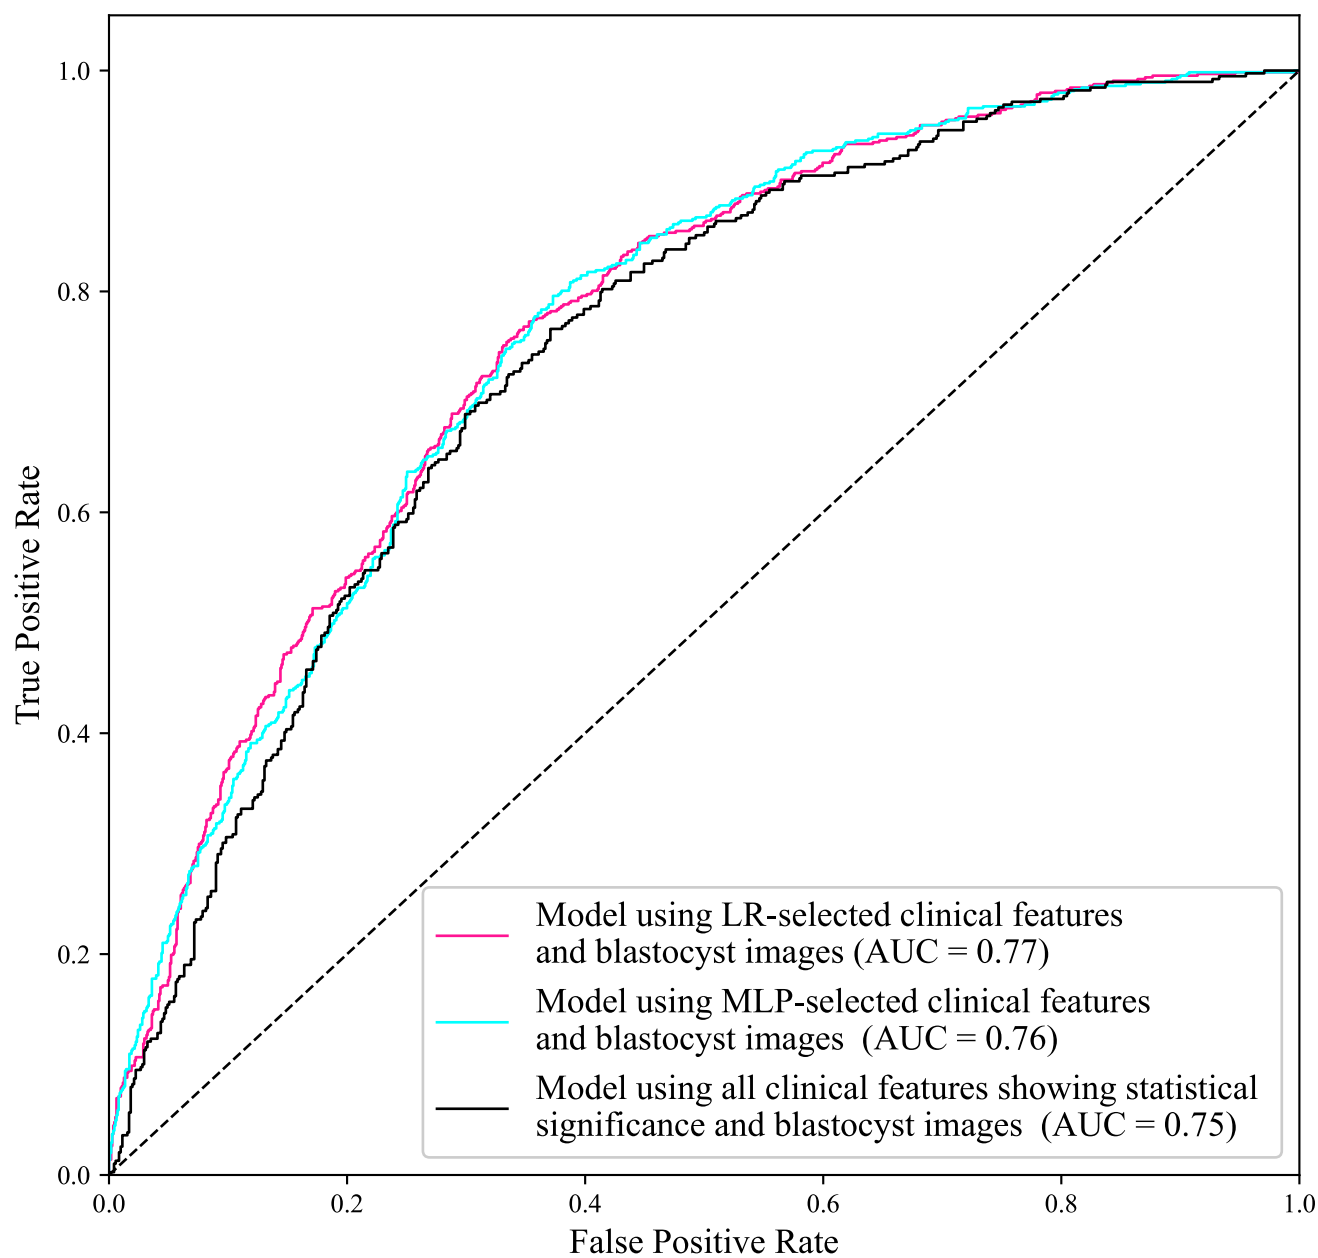

Supplement: supp [file elife-83662-supp-v1.zip]

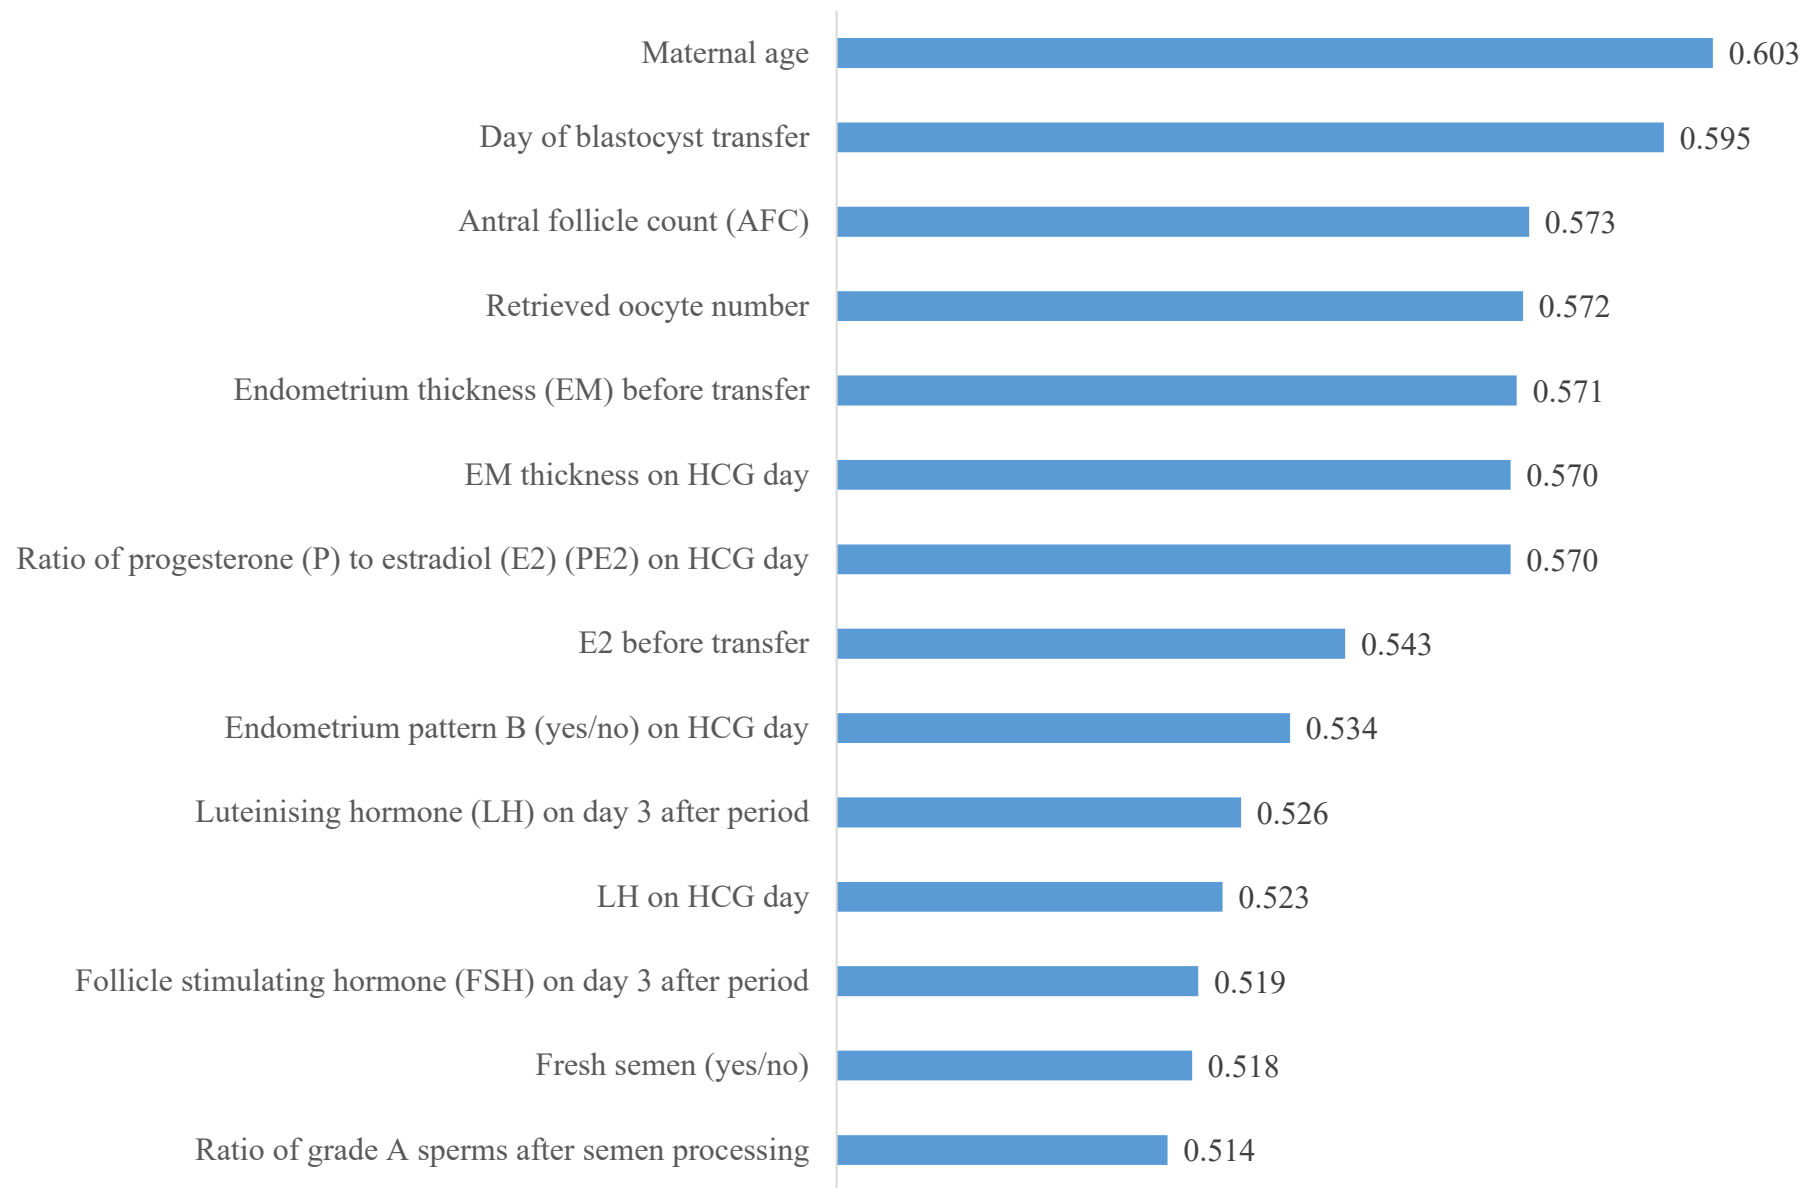

Supplement: supp [file elife-83662-supp-v1.zip]
